# Supplementary material for: Minor Contribution of Endogenous GLP-1 and GLP-2 to Postprandial Lipemia in Obese Men
Source: PubMed Central journal article supplement (PMC4709062; doi:10.1371/journal.pone.0145890), 2016-01-11

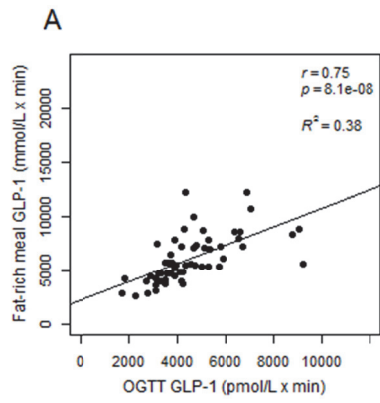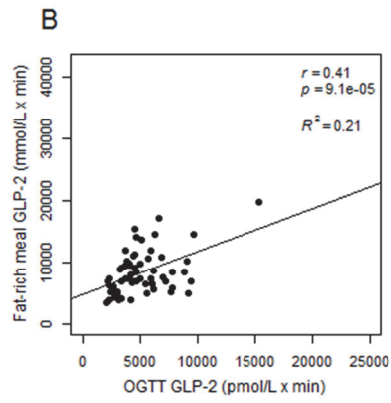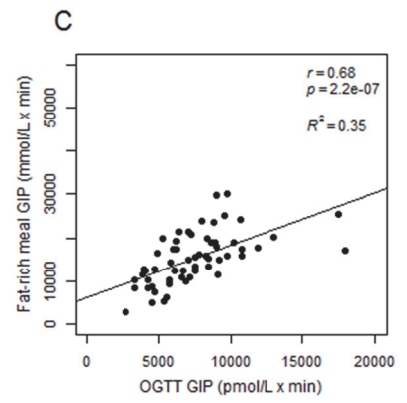

Supplement: pone.0145890.s001.pdf [file pone.0145890.s001.pdf]
