# Supplementary material for: Minor Contribution of Endogenous GLP-1 and GLP-2 to Postprandial Lipemia in Obese Men
Source: PubMed Central journal article supplement (PMC4709062; doi:10.1371/journal.pone.0145890), 2016-01-11
Supplement: pone.0145890.s004.pdf [file pone.0145890.s004.pdf]

|                      | <b>Baseline<br/>mean ± SD</b> | <b>180 min<br/>mean ± SD</b> | <b>240 min<br/>mean ± SD</b> | <b>360<br/>mean ± SD</b> | <b>480 min<br/>mean ± SD</b> |
|----------------------|-------------------------------|------------------------------|------------------------------|--------------------------|------------------------------|
| TG plasma (mmol/L)   | 1.39 ± 0.78                   | 2.49 ± 1.03 **               | 2.82 ± 1.20 **               | 2.48 ± 1.70 **           | 1.69 ± 1.29 *                |
| TG Chylo (mmol/L)    | 0.11 ± 0.13                   | 0.78 ± 0.51 **               | 0.96 ± 0.63 **               | 0.70 ± 0.85 **           | 0.31 ± 0.45 **               |
| TG VLDL1 (mmol/L)    | 0.57 ± 0.47                   | 0.86 ± 0.48 **               | 0.94 ± 0.53 **               | 0.87 ± 0.63 **           | 0.59 ± 0.63                  |
| apoB48 Chylo (mg/L)  | 0.05 ± 0.10                   | 0.67 ± 0.56 **               | 0.87 ± 0.75 **               | 0.68 ± 0.87 **           | 0.3 ± 0.54 **                |
| apoB48 VLDL1 (mg/L)  | 0.58 ± 0.56                   | 1.67 ± 0.80 **               | 1.79 ± 0.90 **               | 1.62 ± 1.16 **           | 1.04 ± 1.18 **               |
| apoB100 Chylo (mg/L) | 0.72 ± 1.15                   | 1.25 ± 1.35 **               | 1.44 ± 1.48 **               | 1.47 ± 1.87 **           | 0.97 ± 1.78 *                |
| apoB100 VLDL1 (mg/L) | 26.8 ± 26.1                   | 37.0 ± 30.9 **               | 40.5 ± 36.1 **               | 35.9 ± 28.5 **           | 25.4 ± 25.9                  |
| apoB48 plasma (mg/L) | 9.10 ± 4.41                   | 15.9 ± 5.13 **               | 17.1 ± 6.58 **               | 15.6 ± 7.90 **           | 12.4 ± 7.36 **               |
