# Supplementary material for: Minor Contribution of Endogenous GLP-1 and GLP-2 to Postprandial Lipemia in Obese Men
Source: PubMed Central journal article supplement (PMC4709062; doi:10.1371/journal.pone.0145890), 2016-01-11
Supplement: pone.0145890.s005.pdf [file pone.0145890.s005.pdf]

| Fat-rich meal TRL AUCs     | Insulin AUC | Glucose AUC | Adiponectin | HOMA-IR | HOMA-IS |
|----------------------------|-------------|-------------|-------------|---------|---------|
| TG Plasma(mmol/L × min)    | 0.32 *      | 0.29*       | -0.39 **    | 0.22 *  | 0.12    |
| TG Chylo (mmol/L × min)    | 0.27        | 0.26 *      | -0.42 **    | 0.10    | 0.01    |
| TG VLDL1 (mmol/L × min)    | 0.30 *      | 0.28        | -0.42 **    | 0.22 *  | 0.11    |
| ApoB48 Plasma (mg/L x min) | 0.19        | 0.21        | -0.14       | 0.30    | 0.14    |
| ApoB48 Chylo (mg/L × min)  | 0.18        | 0.10        | -0.21       | 0.10    | 0.02    |
| ApoB48 VLDL1 (mg/L × min)  | 0.33 *      | 0.27        | -0.29 **    | 0.28 *  | 0.14 *  |
